# Supplementary material for: Labor augmentation with oxytocin in low- and lower-middle-income countries: a systematic review and meta-analysis
Source: PubMed Central journal article supplement — AJOG Glob Rep. 2022 Oct 21;2(4):100123. doi: 10.1016/j.xagr.2022.100123 (PMC9664020; doi:10.1016/j.xagr.2022.100123), 2022-10-21
Supplement: mmc1.pdf [file mmc1.pdf]

## Supplementary text 1: Literature search conducted in pubmed until January 1<sup>st</sup> 2022

("Oxytocin"[Mesh] OR "Oxytocics" [Pharmacological Action] OR "Oxytocics"[Mesh] OR Oxytocin[Title/Abstract] OR Syntocinon[Title/Abstract] OR Pitocin[Title/Abstract] OR Oxytocin[Title/Abstract] OR carbetocin[Title/Abstract] OR oxytocic\*[Title/Abstract] OR augment\*[Title/Abstract] OR "active management"[Title/Abstract]) AND (Afghanistan[Title/Abstract] OR Angola[Title/Abstract] OR Albania[Title/Abstract] OR Argentina[Title/Abstract] OR Armenia[Title/Abstract] OR Samoa[Title/Abstract] OR Azerbaijan[Title/Abstract] OR Burundi[Title/Abstract] OR Benin[Title/Abstract] OR "Burkina Faso"[Title/Abstract] OR Bangladesh[Title/Abstract] OR Bulgaria[Title/Abstract] OR Bosnia[Title/Abstract] OR Herzegovina[Title/Abstract] OR Belarus[Title/Abstract] OR Belize[Title/Abstract] OR Bolivia[Title/Abstract] OR Brazil[Title/Abstract] OR Bhutan[Title/Abstract] OR Botswana[Title/Abstract] OR "Central African Republic"[Title/Abstract] OR China[Title/Abstract] OR Cote d'Ivoire[Title/Abstract] OR Cameroon[Title/Abstract] OR Congo[Title/Abstract] OR Congo[Title/Abstract] OR Colombia[Title/Abstract] OR Comoros[Title/Abstract] OR "Cabo Verde"[Title/Abstract] OR "Costa Rica"[Title/Abstract] OR Cuba[Title/Abstract] OR Djibouti[Title/Abstract] OR "Dominican Republic"[Title/Abstract] OR Algeria[Title/Abstract] OR Ecuador[Title/Abstract] OR Egypt[Title/Abstract] OR Eritrea[Title/Abstract] OR Ethiopia[Title/Abstract] OR Fiji[Title/Abstract] OR Micronesia[Title/Abstract] OR Gabon[Title/Abstract] OR Georgia[Title/Abstract] OR Ghana[Title/Abstract] OR Guinea[Title/Abstract] OR Gambia[Title/Abstract] OR "Guinea-Bissau"[Title/Abstract] OR Guinea[Title/Abstract] OR Grenada[Title/Abstract] OR Guatemala[Title/Abstract] OR Guyana[Title/Abstract] OR Honduras[Title/Abstract] OR Haiti[Title/Abstract] OR Indonesia[Title/Abstract] OR India[Title/Abstract] OR Iran[Title/Abstract] OR Iraq[Title/Abstract] OR Jamaica[Title/Abstract] OR Jordan[Title/Abstract] OR Kazakhstan[Title/Abstract] OR Kenya[Title/Abstract] OR Kyrgyz [Title/Abstract] OR Cambodia[Title/Abstract] OR Lebanon[Title/Abstract] OR Liberia[Title/Abstract] OR Libya[Title/Abstract] OR "St. Lucia" [Title/Abstract] OR Sri Lanka [Title/Abstract] OR Lesotho[Title/Abstract] OR Morocco[Title/Abstract] OR Moldova[Title/Abstract] OR Madagascar[Title/Abstract] OR Maldives[Title/Abstract] OR Mexico[Title/Abstract] OR "Marshall Islands"[Title/Abstract] OR Macedonia[Title/Abstract] OR Mali[Title/Abstract] OR Myanmar[Title/Abstract] OR Montenegro[Title/Abstract] OR Mongolia[Title/Abstract] OR Mozambique[Title/Abstract] OR Mauritania[Title/Abstract] OR Malawi[Title/Abstract] OR Malaysia[Title/Abstract] OR Namibia[Title/Abstract] OR Niger[Title/Abstract] OR Nigeria[Title/Abstract] OR Nicaragua[Title/Abstract] OR Nepal[Title/Abstract] OR Pakistan[Title/Abstract] OR Peru [Title/Abstract] OR Philippines[Title/Abstract] OR "Papua New Guinea"[Title/Abstract] OR Korea [Title/Abstract] OR Paraguay[Title/Abstract] OR "West Bank"[Title/Abstract] OR Gaza [Title/Abstract] OR Russia [Title/Abstract] OR Rwanda[Title/Abstract] OR Sudan[Title/Abstract] OR Senegal[Title/Abstract] OR "Solomon Islands"[Title/Abstract] OR "Sierra Leone"[Title/Abstract] OR "El Salvador"[Title/Abstract] OR Somalia[Title/Abstract] OR Serbia[Title/Abstract] OR "Sudan" [Title/Abstract] OR "Sao Tome" [Title/Abstract] OR "Suriname"[Title/Abstract] OR Eswatini[Title/Abstract] OR Syrian[Title/Abstract] OR Chad[Title/Abstract] OR Togo[Title/Abstract] OR Thailand[Title/Abstract] OR Tajikistan[Title/Abstract] OR Turkmenistan[Title/Abstract] OR "Timor-Leste"[Title/Abstract] OR Tonga[Title/Abstract] OR Tunisia[Title/Abstract] OR Turkey[Title/Abstract] OR Tuvalu[Title/Abstract] OR Tanzania[Title/Abstract] OR Uganda[Title/Abstract] OR Ukraine[Title/Abstract] OR Uzbekistan[Title/Abstract] OR "St. Vincent"[Title/Abstract] OR Grenadines[Title/Abstract] OR Venezuela [Title/Abstract] OR Vietnam [Title/Abstract] OR Vanuatu[Title/Abstract] OR Samoa[Title/Abstract] OR Kosovo[Title/Abstract] OR Yemen[Title/Abstract] OR "South Africa" [Title/Abstract] OR Zambia[Title/Abstract] OR Zimbabwe[Title/Abstract] OR "Hospitals, Rural"[Mesh] OR "Caribbean Region"[Mesh] OR "South America"[Mesh] OR "Middle East"[Mesh] OR "Latin America"[Mesh] OR "Central America"[Mesh] OR "Asia"[Mesh] OR "Africa"[Mesh] OR "Poverty"[Mesh] OR "World Health Organization" [Mesh] OR "world health organisation"[Title/Abstract] OR "world health organization"[Title/Abstract] OR "developing countr\*"[Title/Abstract] OR "low income"[Title/Abstract] OR "middle income"[Title/Abstract] OR "poor countr\*"[Title/Abstract] OR "resource poor"[Title/Abstract] OR "low resource"[Title/Abstract] OR rural[Title/Abstract] OR Africa[Title/Abstract] OR asia[Title/Abstract] OR "south america"[Title/Abstract] OR "central america"[Title/Abstract] OR "latin america"[Title/Abstract] OR "middle east"[Title/Abstract]) AND ("Apgar Score"[Mesh] OR "Fetal Death"[Mesh] OR "Intensive Care, Neonatal"[Mesh] OR "Asphyxia Neonatorum"[Mesh] OR "Fetal Distress"[Mesh] OR "Uterine Rupture"[Mesh] OR "Pregnancy Outcome"[Mesh] OR "Dystocia"[MeSH Terms] OR "Labor Stage, Second" [mesh terms] OR "Labor Stage, First"[Mesh] OR "cesarean section" [Mesh] OR "Cephalopelvic Disproportion"[Mesh] OR apgar[Title/Abstract] OR stillbirth[Title/Abstract] OR encephalopathy[Title/Abstract] OR "fetal distress" [Title/Abstract] OR asphyxia[Title/Abstract] OR "uterine rupture"[Title/Abstract] OR dystocia[Title/Abstract] OR "partograph"[Title/Abstract] OR intrapartum[Title/Abstract] OR "cesarean section\*"[Title/Abstract] OR "C Section\*"[Title/Abstract] OR "Cephalopelvic Disproportion"[Title/Abstract] OR CPD[Title/Abstract] OR "Abnormal progress\*"[Title/Abstract] OR "Failure to progress"[Title/Abstract] OR "prolonged

labour"[Title/Abstract] OR "delayed labour"[Title/Abstract] OR "labour duration"[Title/Abstract] OR "labour progress\*"[Title/Abstract] OR "slow labour"[Title/Abstract] OR "obstructed labour"[Title/Abstract] OR "labour arrest\*"[Title/Abstract] OR "arrested labour"[Title/Abstract] OR "abnormal labour"[Title/Abstract] OR "protracted labour"[Title/Abstract] OR "accelerate labour"[Title/Abstract] OR "prolonged labor"[Title/Abstract] OR "delayed labor"[Title/Abstract] OR "labor duration"[Title/Abstract] OR "labor progress\*"[Title/Abstract] OR "slow labor"[Title/Abstract] OR "obstructed labor"[Title/Abstract] OR "labor arrest\*"[Title/Abstract] OR "arrested labor"[Title/Abstract] OR "abnormal labor"[Title/Abstract] OR "protracted labor"[Title/Abstract] OR "accelerate labor"[Title/Abstract])
