# Supplementary material for: Labor augmentation with oxytocin in low- and lower-middle-income countries: a systematic review and meta-analysis
Source: PubMed Central journal article supplement — AJOG Glob Rep. 2022 Oct 21;2(4):100123. doi: 10.1016/j.xagr.2022.100123 (PMC9664020; doi:10.1016/j.xagr.2022.100123), 2022-10-21
Supplement: mmc2.pdf [file mmc2.pdf]

**Supplementary table 2: Critical Appraisal tool modified from the Newcastle Ottawa Score (NOS):**

| Type of bias                                                                                                                                                                            | Low risk of bias                                                                                                                                                                                                                                                                                                                         | High risk of bias                                                                                                                                                                                                                                               |
|-----------------------------------------------------------------------------------------------------------------------------------------------------------------------------------------|------------------------------------------------------------------------------------------------------------------------------------------------------------------------------------------------------------------------------------------------------------------------------------------------------------------------------------------|-----------------------------------------------------------------------------------------------------------------------------------------------------------------------------------------------------------------------------------------------------------------|
| <b>Selection</b>                                                                                                                                                                        |                                                                                                                                                                                                                                                                                                                                          |                                                                                                                                                                                                                                                                 |
| Representativeness of cases (case-control studies)<br>Representativeness of the exposed cohort (cohort studies)<br>Representativeness of the study population (cross-sectional studies) | Consecutive or obvious representative series of cases (i.e. If drawn from all hospital records or a geographical area)                                                                                                                                                                                                                   | Non random sample from community<br>Selected only during day/night time<br>Excluding group at higher/lower risk of augmentation                                                                                                                                 |
| Selection of controls (case control studies)<br>Selection of unexposed cohort (cohort studies)                                                                                          | Community population,<br>Same labour ward as the cases<br>Not admitted to NICU/special care units                                                                                                                                                                                                                                        | NICU/special care units<br>Different labour ward than the cases                                                                                                                                                                                                 |
| End point (only applicable for studies measuring stillbirths)                                                                                                                           | Distinguishing between pre-hospital and intra hospital stillbirths.                                                                                                                                                                                                                                                                      | Not distinguishing between pre-hospital and intra-hospital stillbirths.                                                                                                                                                                                         |
| <b>Comparability</b>                                                                                                                                                                    |                                                                                                                                                                                                                                                                                                                                          |                                                                                                                                                                                                                                                                 |
| Control for confounders                                                                                                                                                                 | Study controls for labour duration and induction.                                                                                                                                                                                                                                                                                        | Study does not control for labour duration and induction.                                                                                                                                                                                                       |
| <b>Outcomes (Stillbirth, Apgar score, resuscitation, and encephalopathy)</b>                                                                                                            |                                                                                                                                                                                                                                                                                                                                          |                                                                                                                                                                                                                                                                 |
| Assessment of outcome                                                                                                                                                                   | <u>Apgar score, resuscitation, and encephalopathy:</u><br>Independent blind assessment (researcher observing the birth outcome without knowing the exposure).<br>Record linkage with validated records.<br><br><u>Stillbirths and day-one mortality</u><br>Parental information.<br>Medical records, validated.<br>Clinical observation. | <u>Apgar score, resuscitation and encephalopathy:</u><br>Non-blinded assessment.<br>Medical records, not validated.<br>Parental information.<br><br><u>Stillbirths and day-one mortality:</u><br>Medical records not validated (underreporting of stillbirths). |
| <b>Exposure (oxytocin)</b>                                                                                                                                                              |                                                                                                                                                                                                                                                                                                                                          |                                                                                                                                                                                                                                                                 |
| Ascertainment of exposure (oxytocin)                                                                                                                                                    | Records incl. assessment of whether oxytocin is reliably documented: I.e. validation through observations.<br>Direct observations.                                                                                                                                                                                                       | Medical records, not validated.<br>Parental interview/questionnaire.                                                                                                                                                                                            |
| Same method for ascertainment of cases and controls                                                                                                                                     | Yes                                                                                                                                                                                                                                                                                                                                      | No                                                                                                                                                                                                                                                              |
| Incomplete data                                                                                                                                                                         | Same rate for both groups.<br>Incomplete data < 10 %.                                                                                                                                                                                                                                                                                    | Different rate or not described.<br>Incomplete data > 10 %.                                                                                                                                                                                                     |



|                     |       |  |  |  |  |     |  |  |       |
|---------------------|-------|--|--|--|--|-----|--|--|-------|
| Van Roosmalen, 1989 | Green |  |  |  |  | Red |  |  | Red   |
| Obel, 2021          | Green |  |  |  |  | Red |  |  | Red   |
| Munan, 2017         | Green |  |  |  |  | Red |  |  | Red   |
| Azandegbé, 2004     | Green |  |  |  |  | Red |  |  | Red   |
| Spitzer, 2014       | Green |  |  |  |  | Red |  |  | Green |
| Lyengar, 2009       | Green |  |  |  |  | Red |  |  | Red   |

Green: low risk of bias. Red: High risk of bias. White: not applicable
