# Supplementary material for: Labor augmentation with oxytocin in low- and lower-middle-income countries: a systematic review and meta-analysis
Source: PubMed Central journal article supplement — AJOG Glob Rep. 2022 Oct 21;2(4):100123. doi: 10.1016/j.xagr.2022.100123 (PMC9664020; doi:10.1016/j.xagr.2022.100123), 2022-10-21
Supplement: mmc4.pdf [file mmc4.pdf]

**Supplementary table 5: Study characteristics**  
Excluding case-control and cohort studies. For these, see table 1.

| Background information |          |                  |                                                                      | Study population      |                                         |                                                                                                                                                                                                                          |                                                                                                                                              | Oxytocin exposure                                                                                                                                                                    |                                                                                                                                                                                                                                                                             |                                                                                                     | Context                          |                                                                                                                      |                                                                                                                                                                                                                                                                                                                                                                                                                                    |                                                                                                                                                                                                                                                                                                                                                                                          |                                                                                          |                                                                                                                                                                                                                             |                     |                                                                          |                                                                                                                                                                                                                                                                                                                                                                                         |                                                                                                                                                                                                                              |
|------------------------|----------|------------------|----------------------------------------------------------------------|-----------------------|-----------------------------------------|--------------------------------------------------------------------------------------------------------------------------------------------------------------------------------------------------------------------------|----------------------------------------------------------------------------------------------------------------------------------------------|--------------------------------------------------------------------------------------------------------------------------------------------------------------------------------------|-----------------------------------------------------------------------------------------------------------------------------------------------------------------------------------------------------------------------------------------------------------------------------|-----------------------------------------------------------------------------------------------------|----------------------------------|----------------------------------------------------------------------------------------------------------------------|------------------------------------------------------------------------------------------------------------------------------------------------------------------------------------------------------------------------------------------------------------------------------------------------------------------------------------------------------------------------------------------------------------------------------------|------------------------------------------------------------------------------------------------------------------------------------------------------------------------------------------------------------------------------------------------------------------------------------------------------------------------------------------------------------------------------------------|------------------------------------------------------------------------------------------|-----------------------------------------------------------------------------------------------------------------------------------------------------------------------------------------------------------------------------|---------------------|--------------------------------------------------------------------------|-----------------------------------------------------------------------------------------------------------------------------------------------------------------------------------------------------------------------------------------------------------------------------------------------------------------------------------------------------------------------------------------|------------------------------------------------------------------------------------------------------------------------------------------------------------------------------------------------------------------------------|
| No                     | Author   | Publication year | Study period                                                         | Country               | Study type                              | Aim of the study/intervention                                                                                                                                                                                            | Data source                                                                                                                                  | Inclusion criteria                                                                                                                                                                   | Exclusion criteria                                                                                                                                                                                                                                                          | Study population                                                                                    | With oxytocin                    | Oxytocin rate                                                                                                        | Other oxytocin rates                                                                                                                                                                                                                                                                                                                                                                                                               | Facility (including level, rural/urban, private/public etc)                                                                                                                                                                                                                                                                                                                              | Annual births and ratio                                                                  | Oxytocin protocol and monitoring                                                                                                                                                                                            | Oxytocin indication | Monitoring technique                                                     | FHR                                                                                                                                                                                                                                                                                                                                                                                     | Monitoring practice (actual practice reported)                                                                                                                                                                               |
| 1                      | Hassan   | 2012             | 2005-2006<br>2007-2008<br>2010                                       | Palestine             | Interventional one-armed pre-post study | Quality of care                                                                                                                                                                                                          | Interviews with women if labour and birth occurred between 7 AM and 4 PM. 30.6% reported that they did not know if they were given oxytocin. | GA > 37 weeks.<br>Singleton, cephalic pregnancies.<br>Uncomplicated pregnancies.                                                                                                     | Birth before arrival and delivery by elective cesarean section.                                                                                                                                                                                                             | 134                                                                                                 | 43                               | 32.1% (baseline)                                                                                                     | Post-intervention: 10.9%<br>12.1%<br>17.7%                                                                                                                                                                                                                                                                                                                                                                                         | Referral governmental hospital. Urban. Public. CS available.                                                                                                                                                                                                                                                                                                                             | 4000                                                                                     |                                                                                                                                                                                                                             |                     |                                                                          | IA                                                                                                                                                                                                                                                                                                                                                                                      | The providers reported that they use oxytocin without the use of infusion pumps machines, continuous foetal monitoring and partographs.                                                                                      |
| 2                      | Agha     | 2019             | April to June 2014                                                   | Pakistan              | Observational cross-sectional study     | Quality of care                                                                                                                                                                                                          | Direct observations during day time only.                                                                                                    | Not specified                                                                                                                                                                        |                                                                                                                                                                                                                                                                             | 110                                                                                                 | 208                              | 67%                                                                                                                  |                                                                                                                                                                                                                                                                                                                                                                                                                                    | 126 district level referral facilities and primary health care facilities.<br>Public sector facilities (28%) and private sector facilities (72%).                                                                                                                                                                                                                                        | 4-133 per month                                                                          |                                                                                                                                                                                                                             |                     | Partographs                                                              |                                                                                                                                                                                                                                                                                                                                                                                         | FHR was monitored in 40% of births.<br>Partographs was used in 3% of births.                                                                                                                                                 |
| 3                      | Makamugo | 2019             | December 2014 to January 2015                                        | Rwanda                | Observational cross-sectional study     | Quality of care                                                                                                                                                                                                          | Medical records, not validated.                                                                                                              | All term births.<br>Singleton, cephalic pregnancies.<br>Uncomplicated pregnancies.<br>Spontaneous onset of labour.<br>Positive foetal heart on admission.<br>Women aged 20-40 years. | Previous caesarean section, HIV positive, severe bleeding in third trimester or on arrival, hypertension or preeclampsia, diabetes mellitus, and having been transferred to a hospital other than the 18 selected facilities after starting labour and before giving birth. | 435                                                                                                 | 52                               | 12%                                                                                                                  | Primigravida: 14.3%<br>Multigravida: 10.3%                                                                                                                                                                                                                                                                                                                                                                                         | 18 healthcare facilities in Kigali City and the Northern Province: Eight health centres (28.7%), seven district hospitals (40%), one provincial hospital, one private hospital, and one referral hospital.<br>CS available.                                                                                                                                                              | < 600<br>Ratio: 1 staff:3-5 beds                                                         |                                                                                                                                                                                                                             |                     | Partographs                                                              |                                                                                                                                                                                                                                                                                                                                                                                         | Partographs was used in 84.8% of deliveries.                                                                                                                                                                                 |
| 4                      | Chah     | 2007             | December 2005 to January 2006                                        | Nigeria               | Observational cross-sectional study     | To evaluate pain perception among parturients.                                                                                                                                                                           | Self-reported questionnaires 24 hours after birth. 28% incorrectly filled.                                                                   | Unspecified vaginal births.<br>Spontaneous onset.                                                                                                                                    |                                                                                                                                                                                                                                                                             | 101                                                                                                 | 20                               | 19.9%                                                                                                                |                                                                                                                                                                                                                                                                                                                                                                                                                                    | Four health institutions: The University of Nigeria Teaching Hospital (UNTH), the Emu State University of Science and Technology (ESUT) Teaching Hospital, the Mother of Christ Maternity Hospital and the Madonna Infirmiry.<br>CS available.                                                                                                                                           |                                                                                          |                                                                                                                                                                                                                             |                     |                                                                          |                                                                                                                                                                                                                                                                                                                                                                                         |                                                                                                                                                                                                                              |
| 5                      | Spitzer  | 2014             | November 2009 to January 2010                                        | Kenya                 | Interventional one-armed pre-post study | Quality of care                                                                                                                                                                                                          | Medical records, not validated. Data for oxytocin exposure missing for 3.2% pre- and 11.4% post-intervention.                                | All births.<br>GA > 28 weeks.                                                                                                                                                        |                                                                                                                                                                                                                                                                             | Pre-intervention: 1341<br>Post-intervention: 1812                                                   | 392                              | 33.8% (baseline)                                                                                                     | Post-intervention: 27.4%                                                                                                                                                                                                                                                                                                                                                                                                           | Maternity Teaching and Referral Hospital (MTRH). Urban. Public.<br>CS available.                                                                                                                                                                                                                                                                                                         | 1000                                                                                     |                                                                                                                                                                                                                             |                     |                                                                          |                                                                                                                                                                                                                                                                                                                                                                                         |                                                                                                                                                                                                                              |
| 6                      | Frey     | 2013             | October 2011 to February 2012                                        | Burkina Faso          | Observational cross-sectional study     | To compare women with and without Female Genital Mutilation type 1 and II.                                                                                                                                               | Medical records, not validated. Complete dataset for all included women.                                                                     | All vaginal births.<br>GA > 37 weeks.                                                                                                                                                | Lack of information about FGM (20 deliveries), premature birth (9 deliveries), and cesarean section (24 deliveries).                                                                                                                                                        | 180                                                                                                 | 74                               | 41.1%                                                                                                                |                                                                                                                                                                                                                                                                                                                                                                                                                                    | Sao Camillo Hospital in Nanoso.<br>CS available.                                                                                                                                                                                                                                                                                                                                         | 233 births in total during the study period of 5 months.                                 | 10 IU in 500 ml. of physiologic solution.                                                                                                                                                                                   |                     |                                                                          | IA with stethoscope                                                                                                                                                                                                                                                                                                                                                                     |                                                                                                                                                                                                                              |
| 7                      | Majdyler | 1990             | September 1982 to September 1984<br>October 1984 to October 1986     | Zimbabwe              | Interventional one-armed pre-post study | Quality of care                                                                                                                                                                                                          | Medical records, not validated.                                                                                                              | All births                                                                                                                                                                           |                                                                                                                                                                                                                                                                             | Pre-intervention: 4942<br>Post-intervention: 5273                                                   | 168                              | 3.4% (baseline)                                                                                                      | Post-intervention: 17.4%                                                                                                                                                                                                                                                                                                                                                                                                           | Provincial hospital serving as a referral hospital for all the maternity centers in the district (7661 km2 and 180,000 inhabitants in 1986).<br>CS available.                                                                                                                                                                                                                            | 2500                                                                                     | Oxytocin infusion was started at 2 mL/minute and was increased arithmetically every 30 minutes until contractions of clinically good intensity lasting 45 seconds occurred with a frequency of three to four in 10 minutes. | Partograph          | Doppler for IA.<br>No electronic FHR monitoring or scalp blood sampling. |                                                                                                                                                                                                                                                                                                                                                                                         |                                                                                                                                                                                                                              |
| 8                      | Delvaux  | 2007             | July 2002 to May 2003                                                | Cote d'Ivoire         | Observational cross-sectional study     | Quality of care                                                                                                                                                                                                          | Direct observations                                                                                                                          | All vaginal births                                                                                                                                                                   |                                                                                                                                                                                                                                                                             | 229                                                                                                 | 41                               | 18%                                                                                                                  |                                                                                                                                                                                                                                                                                                                                                                                                                                    | Four urban maternity wards. Three health centres performing normal deliveries and a secondary referral hospital managing complicated deliveries. All facilities are publicly funded.                                                                                                                                                                                                     | 1400 - 3000                                                                              | Oxytocin were mostly administered by intramuscular injections.                                                                                                                                                              | Partograph          |                                                                          | Assessment of the FHR in 60% of deliveries. Contractions were monitored once in 9% of deliveries. The partograph was completed during labour in only 5% of deliveries, but filled after delivery in 48% of deliveries. In two of the sites, the partograph was completed after delivery in more than 60% and 98% of deliveries, respectively.                                           |                                                                                                                                                                                                                              |
| 9                      | Khalil   | 2004             | October 10th to November 6th 2001                                    | Egypt                 | Observational cross-sectional study     | Quality of care                                                                                                                                                                                                          | Direct observations                                                                                                                          | All term births.<br>Singleton, cephalic pregnancies.<br>In active labour.                                                                                                            | Complicated obstetric history in current or previous pregnancy.                                                                                                                                                                                                             | 188                                                                                                 | 171                              | 91%                                                                                                                  |                                                                                                                                                                                                                                                                                                                                                                                                                                    | Influenza obstetric teaching hospital in central Cairo.                                                                                                                                                                                                                                                                                                                                  | 20,000<br>Ratio: 1:8<br>4 women per bed                                                  | The facility used gravity-fed infusions.<br>Oxytocin 5 IU was the most frequently administered dose for labor augmentation (42%).<br>If cervical dilation < 1 cmh.                                                          |                     |                                                                          | Part                                                                                                                                                                                                                                                                                                                                                                                    | Partographs were not available. Vaginal examination in 30% of women with augmented labor. FHR monitored appropriately in 20% of women with augmented labor.                                                                  |
| 10                     | Sharma   | 2017             | October 2015 to July 2016                                            | India                 | Observational cross-sectional study     | To determine and compare the outcome of deliveries in low risk women with timing of admission, either in active or latent phase of spontaneous labour, related to the rate of intervention and the rate of complications | Direct observations                                                                                                                          | Term.<br>Singleton, cephalic pregnancies.<br>Uncomplicated pregnancies.<br>Spontaneous onset of labour and intact membranes on admission.                                            | Prior caesarean delivery.<br>Any medical or obstetric condition complicating pregnancy.<br>Diagnosed fetal anomalies or death.                                                                                                                                              | 180                                                                                                 | 108                              | 60%                                                                                                                  | Latent phase: 68.75%<br>Active phase: 50.0%                                                                                                                                                                                                                                                                                                                                                                                        | Tertiary care hospital.<br>CS available.                                                                                                                                                                                                                                                                                                                                                 | Not specified                                                                            |                                                                                                                                                                                                                             |                     | Partograph                                                               | If progress of labour was not satisfactory due to weak inefficient uterine contractions.                                                                                                                                                                                                                                                                                                |                                                                                                                                                                                                                              |
| 11                     | Lyengar  | 2009             | June to August 2006<br>August to October 2006                        | India                 | Observational cross-sectional study     | To assess key practices and costs relating to home- and institutional delivery care in rural Rajasthan, India.                                                                                                           | Interviews with women. Identified by Traditional Birth Attendants, childcare workers, volunteers, and local resident women.                  | Vaginal births                                                                                                                                                                       |                                                                                                                                                                                                                                                                             | Small clinics: 36<br>Health centres: 147<br>Hospitals: 222                                          | 25<br>147<br>206                 | Small clinics: 97%<br>Health centres: 93%<br>Hospitals: 93%                                                          | Small clinics: 97% IM inj. and 69% i.v. drip<br>Health centres: 93% IM inj. and 80% i.v. drip<br>Hospitals: 93% IM inj. and 85% i.v. drip                                                                                                                                                                                                                                                                                          | institutional deliveries: Small rural clinics (2% of deliveries) as government subcentres (8.5% of deliveries) and private clinics (1.5% of deliveries), Community Health Centres (CHCs) (10% of deliveries), Primary Health Centres (PHCs) (9% of deliveries), Hospitals on district level (13% of deliveries) - either governmental (11% of deliveries) or private (2% of deliveries). | Community Health Centres: 34<br>Primary Health Centres: 2.4<br>Doctors/nurses per 6 beds | Intramuscular injections or intravenous drip.                                                                                                                                                                               |                     |                                                                          |                                                                                                                                                                                                                                                                                                                                                                                         |                                                                                                                                                                                                                              |
| 12                     | Soza     | 2018             | December 2014 to November 2015                                       | Nigeria and Uganda    | Observational cross-sectional study     | To assess the accuracy of the World Health Organization (WHO) partograph alert line and other candidate predictors in the identification of women at risk of developing severe                                           | Medical records, not validated. Attending staff were approached to complement medical records when needed.                                   | All singleton births.<br>GA > 34 weeks<br>Spontaneous onset of labour presenting at cervical dilatation of < 5.6 cm or undergoing induction of labour.                               | Elective CS.                                                                                                                                                                                                                                                                | 995                                                                                                 | 1498                             | 35%                                                                                                                  |                                                                                                                                                                                                                                                                                                                                                                                                                                    | 13 Hospitals with at least 1000 births.<br>CS available.                                                                                                                                                                                                                                                                                                                                 |                                                                                          |                                                                                                                                                                                                                             |                     | Partograph                                                               | IA using dopamine.                                                                                                                                                                                                                                                                                                                                                                      | Although the partograph was a standard element of medical records in all participating health facilities, its prospective application to guide labour management during the study period varied widely across the hospitals. |
| 13                     | Lovold   | 2008             | October and December 2005                                            | Ethiopia and Tanzania | Observational cross-sectional study     | To summarize current practices, trends, and risks associated with labor induction and augmentation with oxytocin and/or misoprostol in low-income countries.                                                             | Direct observations (AMTSL study) during two 8-hour periods, generally from 7.00 to 23.00 over 2 days in each facility.                      | All vaginal births.                                                                                                                                                                  |                                                                                                                                                                                                                                                                             | Benin: 250<br>Ethiopia: 110<br>Tanzania: 249<br>El Salvador: 192<br>Honduras: 221<br>Nicaragua: 180 | 78<br>37<br>22<br>86<br>71<br>58 | Benin = 31.9%<br>Ethiopia = 11.9%<br>Tanzania = 8.7%<br>El Salvador = 18.8%<br>Honduras = 32.3%<br>Nicaragua = 32.1% | Mostly public. District level hospitals or higher hospitals (national referral hospitals or regional or provincial hospitals), although the 3 sub-Saharan African samples include: Health centres. Furthermore, Benin and Tanzania included private health facilities. Benin = 26 facilities, Ethiopia = 23 facilities, Tanzania: 29 facilities, El Salvador = 25 facilities, Honduras = 15 facilities, Nicaragua = 28 facilities. | 1-3 deliveries per day for all facilities.                                                                                                                                                                                                                                                                                                                                               |                                                                                          |                                                                                                                                                                                                                             |                     |                                                                          |                                                                                                                                                                                                                                                                                                                                                                                         |                                                                                                                                                                                                                              |
| 14                     | Sirenen  | 2010             | July 7th to August 25th 2008<br>September 30th to November 17th 2008 | Tanzania              | Interventional one-armed pre-post study | Quality of care                                                                                                                                                                                                          | Direct observations                                                                                                                          | All births with newborns weighing ≥ 1 kg.                                                                                                                                            |                                                                                                                                                                                                                                                                             | Pre-intervention: 558<br>Post-intervention: 550                                                     | 16                               | 0.4% (baseline)                                                                                                      | Post-intervention: 12.0%                                                                                                                                                                                                                                                                                                                                                                                                           | Kagera Regional Referral Hospital.<br>CS available.                                                                                                                                                                                                                                                                                                                                      | 8000                                                                                     |                                                                                                                                                                                                                             |                     | Partographs                                                              | Partograph not filled: 11.7% pre-intervention and 9.3% post-intervention.<br>Partograph filled incomplete: 16.7% pre-intervention and 12.0% post-intervention.<br>Partograph filled complete: 71.6% pre-intervention and 78.7% post-intervention.<br>Regularly FHR monitoring (every 30 minutes) during active labor: 38.8 - 40.2% pre-intervention and 33.1 - 34.6% post-intervention. |                                                                                                                                                                                                                              |

|    |              |      |                                                                                            |                                           |                                         |                                                                                                                                                                          |                                                                                                                                   |                                                                                                                                                                                                             |                                                                                                                                                                                                                                                                                                                              |                                                                                                                                                  |                                          |                                                                              |                                                                                                                                                                                                                                            |                                                                                                                                                                                            |                                                                                                                                                                                                                                            |                                                                                                                                                                                                     |                                                                                                                                                                                               |           |                                                                                                                                                                                                                                      |                                                                                                                                                                                                                                                                                                                                                                                                                                                                                                                                                                                                                                                                                                                                                                                                                      |  |
|----|--------------|------|--------------------------------------------------------------------------------------------|-------------------------------------------|-----------------------------------------|--------------------------------------------------------------------------------------------------------------------------------------------------------------------------|-----------------------------------------------------------------------------------------------------------------------------------|-------------------------------------------------------------------------------------------------------------------------------------------------------------------------------------------------------------|------------------------------------------------------------------------------------------------------------------------------------------------------------------------------------------------------------------------------------------------------------------------------------------------------------------------------|--------------------------------------------------------------------------------------------------------------------------------------------------|------------------------------------------|------------------------------------------------------------------------------|--------------------------------------------------------------------------------------------------------------------------------------------------------------------------------------------------------------------------------------------|--------------------------------------------------------------------------------------------------------------------------------------------------------------------------------------------|--------------------------------------------------------------------------------------------------------------------------------------------------------------------------------------------------------------------------------------------|-----------------------------------------------------------------------------------------------------------------------------------------------------------------------------------------------------|-----------------------------------------------------------------------------------------------------------------------------------------------------------------------------------------------|-----------|--------------------------------------------------------------------------------------------------------------------------------------------------------------------------------------------------------------------------------------|----------------------------------------------------------------------------------------------------------------------------------------------------------------------------------------------------------------------------------------------------------------------------------------------------------------------------------------------------------------------------------------------------------------------------------------------------------------------------------------------------------------------------------------------------------------------------------------------------------------------------------------------------------------------------------------------------------------------------------------------------------------------------------------------------------------------|--|
| 15 | Mambowa      | 1997 | July 1994 to January 1995                                                                  | Zambia                                    | Observational cross-sectional study     | Quality of care                                                                                                                                                          | Direct observations                                                                                                               | All term births. Singleton, cephalic pregnancies. Spontaneous onset of labour. Uncomplicated pregnancy. In active labour.                                                                                   |                                                                                                                                                                                                                                                                                                                              | Luaka University Teaching Hospital: 30<br>Luaka urban health centres: 10<br>Southern province: 24                                                | 2<br>0<br>1                              | 6.7%<br>0%<br>4.2%                                                           |                                                                                                                                                                                                                                            |                                                                                                                                                                                            | 11 maternity facilities in total (3 urban and 8 rural health facilities): Luaka: 1 University Teaching Hospital (UTH) and 2 urban health centres (LUHC), Southern province (SP): 8 rural hospitals (5 government and 3 mission hospitals). | UTH: 30-40 deliveries per day<br>Urban health centres: 10 deliveries per day<br>Rural facilities: The number of deliveries varied from 5 to no deliveries per day.                                  | 5 IU oxytocin intravenous.                                                                                                                                                                    | Paragraph | Fetal stethoscope                                                                                                                                                                                                                    | Paragraph use: All women at UTH, 50% of women at LUHC and 25% of women in SP. In SP the midwives used self-designed observation charts for 50% of the women. The paragraph was not used effectively in any of the settings and were not available at all institutions studied. Routine performance of vaginal examinations was dictated by the availability of gloves.<br>FHR: Fetal monitoring were not done regularly or not done at all.<br>The women were left alone for long periods, often naked throughout the labour and were therefore cold. They were confined to bed, with poor supervision and no preparation for the delivery, and in some cases even no assistance by the midwife during delivery. One midwife in SP could not be at the bedside of the labouring woman, since she was assigned duties |  |
| 16 | Jama         | 2013 | August to November 2007                                                                    | Bangladesh                                | Observational cross-sectional study     | To examine the birth outcome of women with timing of admission either in active or latent phase of spontaneous labour                                                    | Direct observations                                                                                                               | Not specified low women were selected. Term. Singleton, cephalic pregnancies. Spontaneous onset of labour. Uncomplicated pregnancy. With intact membrane on admission. In active or latent phase of labour. | Preterm caesarean delivery and amniotically diagnosed foetal anomalies or death.                                                                                                                                                                                                                                             | 60                                                                                                                                               | 36                                       | 60%                                                                          | Active: 62.9%<br>Latent: 56%                                                                                                                                                                                                               | Tertiary hospital/University hospital.<br>CS available.                                                                                                                                    |                                                                                                                                                                                                                                            |                                                                                                                                                                                                     | If weak inefficient uterine contractions.                                                                                                                                                     | Paragraph | IA                                                                                                                                                                                                                                   |                                                                                                                                                                                                                                                                                                                                                                                                                                                                                                                                                                                                                                                                                                                                                                                                                      |  |
| 17 | Kalisa R     | 2019 | January to December 2011                                                                   | Rwanda                                    | Observational cross-sectional study     | To explore how often prolonged labour was adequately managed and compare labor progress and fetal outcomes of prolonged and uncomplicated labor using parograph in rural | Medical records, not validated.                                                                                                   | All births. GA > 37 Singleton, cephalic pregnancies. Spontaneous onset of labour. Uncomplicated pregnancy. Cervical dilatation at 1-2-4cm                                                                   | Preterm labour, eclampsia, antepartum haemorrhage, multiple pregnancies or intruterine fetal death.                                                                                                                                                                                                                          | 7605                                                                                                                                             | 2700                                     | 35.5%                                                                        |                                                                                                                                                                                                                                            | One provincial referral hospital for women with high risk pregnancies and complications. Two district hospitals.                                                                           | 2500<br>2300<br>2600                                                                                                                                                                                                                       |                                                                                                                                                                                                     |                                                                                                                                                                                               | Paragraph |                                                                                                                                                                                                                                      |                                                                                                                                                                                                                                                                                                                                                                                                                                                                                                                                                                                                                                                                                                                                                                                                                      |  |
| 18 | Pennada KM   | 2014 | October 2012 to September 2014                                                             | India                                     | Observational cross-sectional study     | To analyse patterns of labour amongst spontaneous parturients using WHO modified paragram and compare outcomes of labour and neonatal outcomes among                     | Medical records or observations                                                                                                   | Consecutive births. GA > 37 weeks Singleton, cephalic pregnancies. Spontaneous onset of labour. Uncomplicated pregnancy. Good obstetric history.                                                            | Medical complications such as: Severe pregnancy induced hypertension, severe anaemia, uncontrolled diabetes. Obstetric complications such as: Major degrees of cephalopelvic disproportion, contracted pelvis, malpresentation, post caesarean pregnancy, multiple pregnancy, preterm labour, antepartum haemorrhage, intra- | 250                                                                                                                                              | 165                                      | 42.8%                                                                        |                                                                                                                                                                                                                                            | Rural hospital.                                                                                                                                                                            |                                                                                                                                                                                                                                            |                                                                                                                                                                                                     |                                                                                                                                                                                               |           | Paragraph                                                                                                                                                                                                                            |                                                                                                                                                                                                                                                                                                                                                                                                                                                                                                                                                                                                                                                                                                                                                                                                                      |  |
| 19 | Sah N        | 2016 | August 2012 to July 2013                                                                   | India                                     | Observational cross-sectional study     | To compare the course of labour and its outcome in primigravidae and multigravidae                                                                                       | Medical records, not validated.                                                                                                   | Consecutive births. GA > 37 weeks. Singleton, cephalic pregnancies. Spontaneous onset of labour. Uncomplicated pregnancy. Cervical dilatation of > 4 cm.                                                    | Previous uterine surgery, cephalopelvic disproportion, associated complications like pre-eclampsia, eclampsia, anaemia, premature rupture of membranes, antepartum haemorrhage, medical illness.                                                                                                                             | 147                                                                                                                                              | 78                                       | 53.1%                                                                        | Primigravida: 43.08%<br>Multigravida: 16.6%                                                                                                                                                                                                | SSK (acronym not explained) hospital in Baroda India. CS available.                                                                                                                        |                                                                                                                                                                                                                                            |                                                                                                                                                                                                     | When the alert line is crossed or at 6 hours after admission if the uterine contractions were inadequate.                                                                                     | Paragraph |                                                                                                                                                                                                                                      |                                                                                                                                                                                                                                                                                                                                                                                                                                                                                                                                                                                                                                                                                                                                                                                                                      |  |
| 20 | Singh S      | 2018 | June 2010 to April 2011                                                                    | India                                     | Observational cross-sectional study     | Quality of care                                                                                                                                                          | Direct observations                                                                                                               | Consecutive births. GA > 34 weeks Singleton, cephalic pregnancies. Uncomplicated pregnancy. Cervical dilatation of > 4 cm.                                                                                  | Women who were shifted out of labour room due to referral to a higher centre for CS or for any other reason and whose observation could not be completed.                                                                                                                                                                    | Medical College (MC): 368<br>District Hospital (DH): 178<br>First Referral Unit (FRU): 489<br>Peripheral Health Centres (PHC): 244<br>Total: 666 | 282<br>108<br>201<br>104                 | MC: 76.6%<br>DH: 29%<br>FRU: 41.1%<br>PHC: 42.6%<br>Total: 45%<br>Total: 45% | MC: 71% IM inj. 77% iv. drip<br>DH: 28% IM inj. 23% iv. drip<br>FRU: 41% IM inj. 37% iv. drip<br>PHC: 39% IM inj. and 43% iv. drip                                                                                                         | 5 medical colleges, 5 district hospitals and one urban sub-district hospital. Rural areas included 20 first referral units or community health centres and 24 rural public health centres. | Community health centres: 500<br>Primary health centres: 200.                                                                                                                                                                              |                                                                                                                                                                                                     |                                                                                                                                                                                               | Paragraph |                                                                                                                                                                                                                                      | Plotting of the parograph was done for only 15.8% of deliveries observed.                                                                                                                                                                                                                                                                                                                                                                                                                                                                                                                                                                                                                                                                                                                                            |  |
| 21 | Van Roomaen  | 1992 | Lugawara Hospital: January 1978 to May 1979<br>Mbozi Hospital: June 1980 to September 1980 | Tanzania                                  | Observational cross-sectional study     | To assess the relation between maternal height and the outcome of labour independent of parity and weight of the newborn.                                                | Medical records, not validated.                                                                                                   | Consecutive births. Singleton, cephalic pregnancies. Newborns > 2 kg.                                                                                                                                       | CS for other reasons than cephalopelvic disproportion.                                                                                                                                                                                                                                                                       | Lugawara: 1995<br>Mbozi: 3869                                                                                                                    | 61<br>147                                | Lugawara: 5.5%<br>Mbozi: 3.8%                                                | Lugawara: Primigravida: 18.8%<br>Multigravida: 1.3%<br>Mbozi: Primigravida: 6.7%<br>Primigravida: 2.9%                                                                                                                                     | Lugawara rural mission Hospital in South western highland of Tanzania.<br>Mbozi hospital, a rural district hospital in south western highland of Tanzania.<br>CS available.                | Lugawara: 1203 (1 years and 6 months) = 902.<br>Mbozi: 4229 (3 years) = 1409.                                                                                                                                                              |                                                                                                                                                                                                     |                                                                                                                                                                                               | Paragraph |                                                                                                                                                                                                                                      |                                                                                                                                                                                                                                                                                                                                                                                                                                                                                                                                                                                                                                                                                                                                                                                                                      |  |
| 22 | Rana         | 2003 | November 3rd 1997 to February 13th 1998                                                    | Nepal                                     | Observational cross-sectional study     | To compare the efficacy of Nepal's first independent midwifery-led unit with an adjacent Consultant-led Maternity Unit (CMU)                                             | Medical records, not validated.                                                                                                   | Consecutive births which were low risk on admission.                                                                                                                                                        | Midwifery-led: 550<br>Physician-led: 438                                                                                                                                                                                                                                                                                     | 66<br>205                                                                                                                                        | Midwifery-led: 47%<br>Physician-led: 47% |                                                                              | The Patan Hospital Birthing Centre.<br>The Birthing Centre (BC) - attached to a district hospital - is the first independent nurse midwifery unit in Nepal. The standard care is the Consultant-Led Maternity Unit (CMU).<br>CS available. | 6000<br>BC = 1200<br>CMU = 3700                                                                                                                                                            |                                                                                                                                                                                                                                            |                                                                                                                                                                                                     | Paragraph                                                                                                                                                                                     | IA        |                                                                                                                                                                                                                                      |                                                                                                                                                                                                                                                                                                                                                                                                                                                                                                                                                                                                                                                                                                                                                                                                                      |  |
| 23 | Saunon       | 2014 | Karnataka: September 5th to October 19th 2011<br>Uttar Pradesh: August 4th to November 7th | India                                     | Observational cross-sectional study     | To describe intrapartum uterine tonic drug use and related behaviors in public health facility-based deliveries and to describe drug storage conditions in               | Direct observations during day time only (8 - 23).                                                                                | Consecutive vaginal births. Women > 18 years old. Cervical dilatation of > 6 cm.                                                                                                                            |                                                                                                                                                                                                                                                                                                                              | Hassan Hospital: 97<br>Bagalkot: 89<br>Agra Hospital: 91<br>Gorakhpur: 89                                                                        | 61<br>54<br>81<br>75                     | Hassan Hospital: 79.6%<br>Agra Hospital: 86.2%<br>Gorakhpur: 91.9%           | Primary health centres: 116<br>Comprehensive health center: 72<br>Subdistrict hospital: 86<br>District hospital: 92                                                                                                                        |                                                                                                                                                                                            |                                                                                                                                                                                                                                            |                                                                                                                                                                                                     |                                                                                                                                                                                               | Paragraph |                                                                                                                                                                                                                                      |                                                                                                                                                                                                                                                                                                                                                                                                                                                                                                                                                                                                                                                                                                                                                                                                                      |  |
| 24 | Ojoja        | 2011 | May 15th to June 14th 2004                                                                 | Nigeria                                   | Observational cross-sectional study     | To determine and compare the average duration of labor of spontaneous onset between nulliparas and multiparas and to determine factors affecting duration of             | Medical records or direct observations.                                                                                           | Consecutive term births. Cephalic pregnancies. Spontaneous onset of labour.                                                                                                                                 | Pre-labor rupture of fetal membranes, fetal death at presentation and instrumental and abnormal deliveries.                                                                                                                                                                                                                  | 238                                                                                                                                              | 51                                       | 22.2%                                                                        |                                                                                                                                                                                                                                            | University of Ibadan Teaching Hospital. CS available.                                                                                                                                      |                                                                                                                                                                                                                                            |                                                                                                                                                                                                     | Augmentation of labor was done by addition of 10 IU of oxytocin into 1 L of intravenous infusion and titrated against uterine contractions until adequate uterine contractions were achieved. | Paragraph | Primard                                                                                                                                                                                                                              |                                                                                                                                                                                                                                                                                                                                                                                                                                                                                                                                                                                                                                                                                                                                                                                                                      |  |
| 25 | Marbo        | 2018 | October 1st 2011 to January 31st 2015                                                      | Tanzania (Zanzibar)                       | Interventional one-armed pre-post study | To evaluate effect of locally tailored labour management guidelines (ParMa guidelines) on intrahospital stillbirths rate                                                 | Medical records, not validated. Missing info ranged from 1% (maternal age and progress on admission) to 14% (ANC and HIV status). | All births with newborn weighing > 1 kg.                                                                                                                                                                    | Sub-samples excluded absence of FHR on admission. Multiple pregnancies.                                                                                                                                                                                                                                                      | 283                                                                                                                                              | 83                                       | 22% (baseline)<br>Post-intervention: 12%                                     |                                                                                                                                                                                                                                            | Public low resource referral hospital. CS available.                                                                                                                                       | 12,000<br>Ratio: 1 staff:4-6 women                                                                                                                                                                                                         | When crossing the action line.                                                                                                                                                                      | Paragraph                                                                                                                                                                                     | IA        | > 90% of women reaching active labour and admitted before second stage had a parograph started, and > 90% of these had first cervical dilation appropriately plotted on the alert line. 235/263 (82%) had at least one FHR recorded. |                                                                                                                                                                                                                                                                                                                                                                                                                                                                                                                                                                                                                                                                                                                                                                                                                      |  |
| 26 | Hassan-Bitar | 2007 | April 2005 to March 2006                                                                   | West Bank, Occupied Palestinian Territory | Observational cross-sectional study     | Quality of care                                                                                                                                                          | Direct observations                                                                                                               | Not specified                                                                                                                                                                                               |                                                                                                                                                                                                                                                                                                                              | 64                                                                                                                                               | 22                                       | 34%                                                                          |                                                                                                                                                                                                                                            | General referral public hospital located in the middle governorate of the West Bank. CS available.                                                                                         | 8000                                                                                                                                                                                                                                       |                                                                                                                                                                                                     |                                                                                                                                                                                               | Paragraph |                                                                                                                                                                                                                                      | National guidelines and parograph seem to exist but not adhered to.                                                                                                                                                                                                                                                                                                                                                                                                                                                                                                                                                                                                                                                                                                                                                  |  |
| 27 | Bood         | 1990 | July 1987 to July 1988                                                                     | Nicaragua                                 | Observational cross-sectional study     | To support the proposition that active management of labour is safe and feasible in the setting of a rural hospital in Nicaragua.                                        | Direct observations under the care of one specific doctor.                                                                        | Nulliparous women. GA > 37 weeks. Singleton cephalic pregnancies admitted in labour.                                                                                                                        | Fetal distress.                                                                                                                                                                                                                                                                                                              | 67                                                                                                                                               | 12                                       | 18%                                                                          |                                                                                                                                                                                                                                            | Polvo Ahamirano Hospital of La Trinidad. 72 bed hospital in rural northern Nicaragua serves approx. 20,000 people of very low income. CS available.                                        |                                                                                                                                                                                                                                            | IOU/Ste, started at 4 drops/min, increasing by 4 drops every 30mins until patient had no more than seven contractions in 15min or was shown by subsequent pelvic exam to have adequate progression. | Paragraph                                                                                                                                                                                     | IA        |                                                                                                                                                                                                                                      |                                                                                                                                                                                                                                                                                                                                                                                                                                                                                                                                                                                                                                                                                                                                                                                                                      |  |
| 28 | Van Roomaen  | 1989 | September 1971 to January 1977 to May 1979                                                 | Tanzania                                  | Observational cross-sectional study     | To assess the influence of maternal height on obstetrical outcome.                                                                                                       | Medical records, not validated.                                                                                                   | All births                                                                                                                                                                                                  |                                                                                                                                                                                                                                                                                                                              | 1054<br>1929                                                                                                                                     | 21<br>89                                 | 0.7%<br>4.6%                                                                 |                                                                                                                                                                                                                                            | Lugawara rural mission Hospital in South western highland of Tanzania. CS available.                                                                                                       |                                                                                                                                                                                                                                            | When crossing the action line.                                                                                                                                                                      | Paragraph                                                                                                                                                                                     | IA        |                                                                                                                                                                                                                                      |                                                                                                                                                                                                                                                                                                                                                                                                                                                                                                                                                                                                                                                                                                                                                                                                                      |  |
| 29 | Obeid        | 2021 | August 2017 to November 2017                                                               | Yemen                                     | Interventional one-armed pre-post study | Quality of care                                                                                                                                                          | Medical records, not validated. Data double entered.                                                                              | Randomly selected vaginal births. GA > 28 weeks. Spontaneous onset of labour.                                                                                                                               |                                                                                                                                                                                                                                                                                                                              | 220<br>193                                                                                                                                       | 50<br>50                                 | 23%<br>26%                                                                   |                                                                                                                                                                                                                                            | Tazr Hoshane Maternal and Child Health (MCH) Hospital run by medicus sans frontiers                                                                                                        | 12,468<br>5232                                                                                                                                                                                                                             |                                                                                                                                                                                                     |                                                                                                                                                                                               | Paragraph | IA                                                                                                                                                                                                                                   |                                                                                                                                                                                                                                                                                                                                                                                                                                                                                                                                                                                                                                                                                                                                                                                                                      |  |

|    |           |      |                                   |                              |                                     |                                                  |                                                                              |                                                                                                   |                      |     |     |       |                                                                                                                                |                                                         |  |            |  |                                                                                                                                                                                                                                                                           |
|----|-----------|------|-----------------------------------|------------------------------|-------------------------------------|--------------------------------------------------|------------------------------------------------------------------------------|---------------------------------------------------------------------------------------------------|----------------------|-----|-----|-------|--------------------------------------------------------------------------------------------------------------------------------|---------------------------------------------------------|--|------------|--|---------------------------------------------------------------------------------------------------------------------------------------------------------------------------------------------------------------------------------------------------------------------------|
| 30 | Manan     | 2017 | December 2013 to May 2014         | Democratic Republic of Congo | Observational cross-sectional study | To compare multiparous and term-pregnant births. | Collected by staff facilitating childbirths. Medical records, not validated. | Singleton births                                                                                  |                      | 184 | 508 | 27.4% | Primigravida: 37.7%<br>Multigravida (2 or more): 22.9%                                                                         | 10 referral maternity hospitals                         |  |            |  |                                                                                                                                                                                                                                                                           |
| 31 | Azandegbe | 2004 | October 1st to December 31st 1998 | Benin                        | Observational cross-sectional study | Evaluation of the partograph                     | Medical records, not validated.                                              | All births.<br>Cervical dilatation < 8 cm<br>No complications requiring obstetrical intervention. | Partographs not used | 898 | 186 | 20.7% | Left of the alert line: 16%<br>Between alert and action line: 46.4%<br>Action line crossed: 1 delivery crossed the action line | 11 maternity wards in urban areas and 31 in rural areas |  | Partograph |  | Administrative data was fully recorded in less than one file out of five and in nearly half of the cases, only two data out of four were provided. 19.6% of the data concerning the dilation was not filled. Less than half of the partographs were correctly filled out. |
