# Supplementary material for: Labor augmentation with oxytocin in low- and lower-middle-income countries: a systematic review and meta-analysis
Source: PubMed Central journal article supplement — AJOG Glob Rep. 2022 Oct 21;2(4):100123. doi: 10.1016/j.xagr.2022.100123 (PMC9664020; doi:10.1016/j.xagr.2022.100123), 2022-10-21
Supplement: mmc5.pdf [file mmc5.pdf]

**Supplementary table 6: average oxytocin rates per country**

Colours are according to figure 2

| Author                                                            | Year | Country          | Population    | Oxytocin     | Oxytocin rate | Average oxytocin rate |
|-------------------------------------------------------------------|------|------------------|---------------|--------------|---------------|-----------------------|
| Average oxytocin rate > 50%                                       |      |                  |               |              |               |                       |
| Janna                                                             | 2013 | Bangladesh       | 60            | 36           | 60%           | 60%                   |
| Agha                                                              | 2019 | Pakistan         | 310           | 208          | 67%           | 67%                   |
| Sharma                                                            | 2017 | India            | 180           | 108          | 60%           |                       |
| Evengar                                                           | 2009 |                  | 632           | 588          | 93%           |                       |
| Stanton                                                           | 2014 |                  | 366           | 241          | 66%           |                       |
| Mohan                                                             | 2021 |                  | 233           | 178          | 76%           |                       |
| Penumadu KM                                                       | 2014 |                  | 250           | 105          | 42%           |                       |
| Singh S                                                           | 2018 |                  | 1479          | 666          | 45%           |                       |
| Khalil                                                            | 2004 | Egypt            | 188           | 171          | 91%           | 91%                   |
| <b>Total</b>                                                      |      |                  | <b>3698</b>   | <b>2301</b>  |               |                       |
| Average oxytocin rate 31% - 50%                                   |      |                  |               |              |               |                       |
| Hassan-Bitar                                                      | 2007 | West Bank, Occup | 64            | 22           | 34%           | 34%                   |
| Lovold                                                            | 2008 | Honduras         | 221           | 71           | 32%           | 32%                   |
| Tann                                                              | 2008 | Uganda           | 408           | 43           | 11%           | 33%                   |
| Souza                                                             | 2018 |                  | 5031          | 1761         | 35%           |                       |
| Rana                                                              | 2003 | Nepal            | 988           | 271          | 27%           |                       |
| Litorp                                                            | 2020 |                  | 78931         | 28915        | 37%           |                       |
| Ellis                                                             | 2000 |                  | 635           | 139          | 22%           |                       |
| Spitzer                                                           | 2014 | Kenya            | 1741          | 592          | 34%           | 34%                   |
| Onah                                                              | 2007 | Nigeria          | 101           | 20           | 20%           |                       |
| Souza                                                             | 2018 |                  | 4964          | 1737         | 35%           |                       |
| Ijaiva                                                            | 2011 |                  | 238           | 53           | 22%           |                       |
| Onyearugha                                                        | 2011 |                  | 98            | 5            | 5%            |                       |
| Frega                                                             | 2013 | Burkina Faso     | 180           | 74           | 41%           | 41%                   |
| Hassan                                                            | 2012 | Palestine        | 134           | 43           | 32%           | 32%                   |
| Mukamurigo                                                        | 2019 | Rwanda           | 435           | 52           | 12%           | 34%                   |
| Kalisa R                                                          | 2019 |                  | 7605          | 2700         | 36%           |                       |
| Lovold                                                            | 2008 | Nicaragua        | 180           | 58           | 32%           | 32%                   |
| <b>Total</b>                                                      |      |                  | <b>101954</b> | <b>36556</b> |               |                       |
| Average oxytocin rate 16% - 30%                                   |      |                  |               |              |               |                       |
| Delvaux                                                           | 2007 | Côte d'Ivoire    | 229           | 41           | 18%           | 18%                   |
| Obel                                                              | 2021 | Yemen            | 413           | 100          | 24%           | 24%                   |
| Munan                                                             | 2017 | DRC              | 1854          | 508          | 27%           | 27%                   |
| Lovold                                                            | 2008 | El Salvador      | 192           | 36           | 19%           | 19%                   |
| Lovold                                                            | 2008 | Benin            | 250           | 78           | 31%           |                       |
| Azandegbé                                                         | 2004 |                  | 898           | 186          | 21%           |                       |
| <b>Total</b>                                                      |      |                  | <b>3586</b>   | <b>871</b>   |               |                       |
| Average oxytocin rate 6% - 15%                                    |      |                  |               |              |               |                       |
| Lovold                                                            | 2008 | Ethiopia         | 310           | 37           | 12%           | 12%                   |
| Hailu                                                             | 2019 |                  | 296           | 38           | 13%           |                       |
| Lovold                                                            | 2008 | Tanzania         | 249           | 22           | 9%            |                       |
| Sorensen                                                          | 2010 |                  | 558           | 36           | 6%            |                       |
| Maaloe                                                            | 2018 |                  | 283           | 63           | 22%           |                       |
| Maaloe                                                            | 2016 |                  | 249           | 58           | 23%           |                       |
| <b>Total</b>                                                      |      |                  | <b>1945</b>   | <b>254</b>   |               |                       |
| Average oxytocin rate 0% - 5%                                     |      |                  |               |              |               |                       |
| Geelhoed                                                          | 2015 | Mosambique       | 300           | 8            | 2.7%          | 2.7%                  |
| <b>Total</b>                                                      |      |                  | <b>300</b>    | <b>8</b>     |               |                       |
| Studies conducted before year 2000, not included in the world map |      |                  |               |              |               |                       |
| Dujardin                                                          | 1995 | Benin            | 1315          | 278          | 21%           |                       |
| Bood                                                              | 1990 | Nicaragua        | 67            | 12           | 18%           |                       |
| Dujardin                                                          | 1995 | Senegal          | 1009          | 108          | 11%           |                       |
| Dujardin                                                          | 1995 | DRC              | 455           | 28           | 6%            |                       |
| Maimbolwa                                                         | 1997 | Zambia           | 84            | 3            | 4%            |                       |
| Muylder                                                           | 1990 | Zimbabwe         | 4942          | 168          | 3%            |                       |
| Van Roosmalen                                                     | 1992 | Tanzania         | 4964          | 208          | 4%            |                       |
| Van Roosmalen                                                     | 1989 |                  | 4983          | 110          | 2%            |                       |
| Mola                                                              | 1990 | Papua New Guinea | 658           | 65           | 10%           |                       |
| <b>Total</b>                                                      |      |                  | <b>18477</b>  | <b>980</b>   |               |                       |
